# Supplementary material for: A ring-strain model for predicting 29Si NMR chemical shifts in polyhedral oligomeric silsesquioxanes and siloxanes
Source: Royal Society of Chemistry journal article supplement (doi:10.1039/d4dt03515a), 2025-01-01
Supplement: d4dt03515a1.pdf [file d4dt03515a1.pdf]

## Supplementary Information

# A Ring-Strain Model for Predicting $^{29}\text{Si}$ NMR Chemical Shifts in Polyhedral Oligomeric Silsesquioxanes and Siloxanes

Mathilde LAIRD<sup>a</sup>, Carole CARCEL<sup>b</sup>, Michel WONG CHI MAN<sup>b</sup> and John R. BARTLETT<sup>c,\*</sup>.

<sup>a</sup>Univ. Bordeaux, CNRS, Bordeaux INP, ISM, UMR 5255, F-33405 Cedex Talence, France

<sup>b</sup>ICGM, Univ Montpellier, CNRS, ENSCM, Montpellier, France

<sup>c</sup>Western Sydney University, Locked Bag 1797 Penrith NSW 2751 Australia.

\*[J.Bartlett@westernsydney.edu.au](mailto:J.Bartlett@westernsydney.edu.au);

### Table of Contents

|                            |                                                                                                                                                                                                                           |    |
|----------------------------|---------------------------------------------------------------------------------------------------------------------------------------------------------------------------------------------------------------------------|----|
| <a href="#">Figure S1:</a> | 3D-projection of the unambiguously identified and characterized $\text{Q}_n$ POS cages. the proportion of Si-atom contributing to each $^{29}\text{Si}$ NMR resonance observed for the compound is given as ".../.../..." | 2  |
| <a href="#">Figure S2:</a> | $\text{T}_6$ POSS before and after cleavage of 3-rings                                                                                                                                                                    | 2  |
| <a href="#">Table S1:</a>  | Selected $^{29}\text{Si}$ NMR Data for $\text{T}_6$ POSS Compounds with equivalent functional groups on all vertices (all Si atoms located in $4^2 3^1$ positions)                                                        | 3  |
| <a href="#">Table S2:</a>  | Selected $^{29}\text{Si}$ NMR Data for $\text{T}_8$ POSS Compounds with equivalent functional groups on all vertices (all Si atoms located in $4^3$ positions)                                                            | 3  |
| <a href="#">Table S3:</a>  | Selected $^{29}\text{Si}$ NMR Data for $\text{T}_{10}$ POSS Compounds with equivalent functional groups on all vertices (all Si atoms located in $5^1 4^2$ positions)                                                     | 5  |
| <a href="#">Table S4:</a>  | Selected $^{29}\text{Si}$ NMR Data for $\text{T}_{12}$ POSS Compounds with equivalent functional groups on all vertices                                                                                                   | 7  |
| <a href="#">Table S5:</a>  | Selected $^{29}\text{Si}$ NMR Data for $\text{T}_n$ POSS Compounds with $n > 12$ and with equivalent functional groups on all vertices                                                                                    | 8  |
| <a href="#">Table S6:</a>  | Selected $^{29}\text{Si}$ NMR Data for $\text{Q}_n$ POS Compounds with equivalent functional groups on all vertices                                                                                                       | 8  |
| <a href="#">Table S7:</a>  | Functional groups used to derive parameters $A'$ , $B'$ , $C'$ and $D'$ in Equation 2 for $\text{Q}_n$ compounds, together with the values of $k_i$ obtained via least-squares fitting                                    | 9  |
| <a href="#">Reference:</a> |                                                                                                                                                                                                                           | 10 |

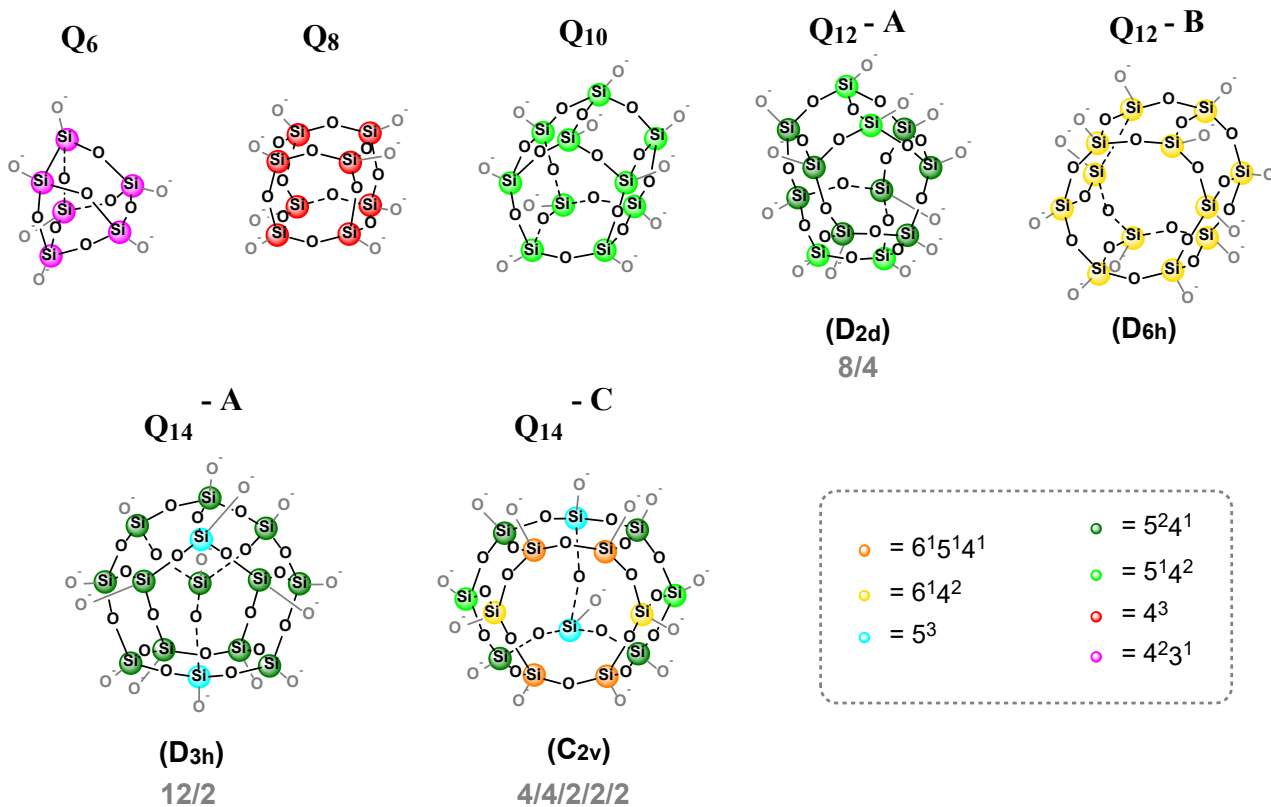

**Figure S1.** 3D-projection of the unambiguously identified and characterized Q<sub>n</sub> POS cages. the proportion of Si-atom contributing to each <sup>29</sup>Si NMR resonance observed for the compound is given as ".../.../..."

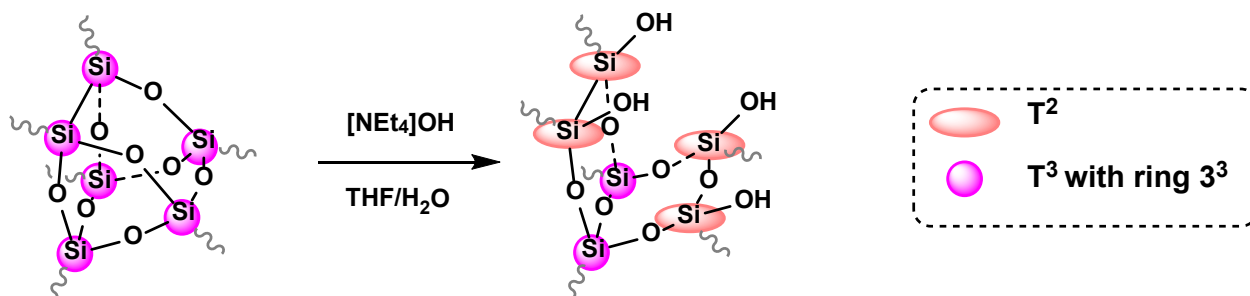

**Figure S2.** T<sub>6</sub> POSS before and after cleavage of 3-rings

**Table S1.** Selected  $^{29}\text{Si}$  NMR Data for  $\text{T}_6$  POSS Compounds with equivalent functional groups on all vertices (all Si atoms located in  $4^23^1$  positions)

| Entry               | Functional Group | NMR Solvent                         | Chemical Shift (ppm) | Ref |
|---------------------|------------------|-------------------------------------|----------------------|-----|
| T <sub>6</sub> -001 | vinyl            | $\text{CDCl}_3$                     | -71.40               | 1   |
| T <sub>6</sub> -002 | phenyl           | $\text{CDCl}_3$                     | -66.9                | 2   |
| T <sub>6</sub> -003 | ethyl            | $\text{CDCl}_3$                     | -56.93               | 1   |
| T <sub>6</sub> -004 | isopropyl        | $\text{CDCl}_3$                     | -54.16               | 3   |
| T <sub>6</sub> -005 | cyclohexyl       | $\text{CDCl}_3$                     | -56.6                | 2   |
|                     |                  | $\text{CDCl}_3/\text{Et}_3\text{N}$ | -56.23               | 4   |
|                     |                  | $\text{THF}-d_8$                    | -56.72               | 5   |
| T <sub>6</sub> -006 | octyl            | $\text{CDCl}_3$                     | -54.2                | 2   |

**Table S2.** Selected  $^{29}\text{Si}$  NMR Data for  $\text{T}_8$  POSS Compounds with equivalent functional groups on all vertices (all Si atoms located in  $4^3$  positions)

| Entry               | Functional Group                                                                    | NMR Solvent                          | Chemical Shift (ppm) | Ref        |
|---------------------|-------------------------------------------------------------------------------------|--------------------------------------|----------------------|------------|
| T <sub>8</sub> -001 | H                                                                                   | $\text{C}_6\text{D}_6$               | -84.45               | 6          |
|                     |                                                                                     | $\text{C}_6\text{D}_6$               | -84.73               | 7          |
|                     |                                                                                     | $\text{CDCl}_3$                      | -84.5                | 8          |
|                     |                                                                                     | $\text{CDCl}_3$                      | -84.7                | 9          |
|                     |                                                                                     | $\text{CDCl}_3$                      | -84.12               | 10         |
|                     |                                                                                     | $\text{CDCl}_3$                      | -84.70               | 11         |
|                     |                                                                                     | $\text{CDCl}_3$                      | -84.70               | 12         |
| T <sub>8</sub> -002 | phenyl                                                                              | Acetone- $d_6$                       | -65.78               | 13         |
|                     |                                                                                     | Acetone- $d_6$                       | -79.7                | 14         |
|                     |                                                                                     | $\text{THF}-d_8$                     | -78.1                | 15         |
|                     |                                                                                     | $\text{THF}-d_8$                     | -78.3                | 16         |
|                     |                                                                                     | $\text{CD}_2\text{Cl}_2$             | -78.3                | 17         |
|                     |                                                                                     | $\text{CDCl}_3$                      | -78.3                | 18         |
|                     |                                                                                     | $\text{CDCl}_3$                      | -78.07               | 19         |
| T <sub>8</sub> -003 | $\text{CH}_2=\text{CH}-$                                                            | Acetone- $d_6$                       | -80.2                | 14, 20, 21 |
|                     |                                                                                     | $\text{THF}-d_8$                     | -80.11               | 22         |
|                     |                                                                                     | $\text{CDCl}_3$                      | -80.19               | 21, 23     |
|                     |                                                                                     | $\text{CDCl}_3$                      | -79                  | 24         |
|                     |                                                                                     | $\text{CDCl}_3$                      | -87                  | 25         |
|                     |                                                                                     | $\text{CDCl}_3$                      | -80.20               | 26         |
|                     |                                                                                     | $\text{CDCl}_3$                      | -80                  | 27         |
|                     |                                                                                     | $\text{CDCl}_3$                      | -81.81               | 28         |
|                     |                                                                                     | $\text{CDCl}_3$                      | -80.2                | 29, 30     |
|                     |                                                                                     | $\text{CDCl}_3$                      | -79.5                | 31         |
|                     |                                                                                     | $\text{CDCl}_3$                      | -81.63               | 7          |
|                     |                                                                                     | $\text{CDCl}_3$                      | -80.19               | 32         |
|                     |                                                                                     | $\text{CDCl}_3$                      | -79.80               | 33         |
|                     | -79.3                                                                               | 20                                   |                      |            |
|                     | -80.0                                                                               | 15                                   |                      |            |
| T <sub>8</sub> -004 | 4-nitrophenyl                                                                       | Acetone- $d_6$                       | -79.22               | 34         |
| T <sub>8</sub> -005 | 4-trimethylsilylphenyl                                                              | $\text{CDCl}_3$                      | -78.4                | 34         |
| T <sub>8</sub> -006 |  | $\text{CDCl}_3$                      | -78.19               | 35         |
| T <sub>8</sub> -007 |  | $\text{CDCl}_3$ or $\text{DMSO}-d_6$ | -78.15               | 36         |
| T <sub>8</sub> -008 | Ethyl                                                                               | $\text{CDCl}_3$                      | -65.5                | 37         |

| Entry                                 | Functional Group                                                                    | NMR Solvent                                               | Chemical Shift (ppm)      | Ref                 |
|---------------------------------------|-------------------------------------------------------------------------------------|-----------------------------------------------------------|---------------------------|---------------------|
|                                       |                                                                                     | CDCl <sub>3</sub>                                         | -65.71                    | 38                  |
|                                       |                                                                                     | CDCl <sub>3</sub>                                         | -65.74                    | 11                  |
| T <sub>8</sub> -009                   | <sup>13</sup> C <sub>3</sub> H <sub>7</sub> -                                       | CDCl <sub>3</sub>                                         | -66.26                    | 3                   |
| T <sub>8</sub> -010                   | Cyclohexyl                                                                          | CDCl <sub>3</sub>                                         | -68.7<br>-69.8<br>-71.19  | 39<br>40<br>41      |
| T <sub>8</sub> -011                   | <sup>13</sup> C <sub>8</sub> H <sub>17</sub> -                                      | CDCl <sub>3</sub>                                         | -66.6<br>-66.64<br>-67.16 | 39<br>11<br>42      |
| T <sub>8</sub> -012                   | C <sub>8</sub> H <sub>17</sub> -                                                    | CDCl <sub>3</sub>                                         | -66.74                    | 38                  |
| T <sub>8</sub> -013                   | ClCH <sub>2</sub> CH <sub>2</sub> CH <sub>2</sub> -                                 | C <sub>6</sub> D <sub>6</sub>                             | -67.11                    | 43                  |
|                                       |                                                                                     | CDCl <sub>3</sub>                                         | -67.07                    | 44                  |
|                                       |                                                                                     | CDCl <sub>3</sub>                                         | -67.28                    | 45                  |
|                                       |                                                                                     | CDCl <sub>3</sub>                                         | -67.1                     | 46                  |
|                                       |                                                                                     | CDCl <sub>3</sub>                                         | -66.2                     | 47                  |
|                                       |                                                                                     | CDCl <sub>3</sub>                                         | -67.0                     | 48                  |
|                                       |                                                                                     | CDCl <sub>3</sub>                                         | -67.0                     | 49                  |
|                                       |                                                                                     | CDCl <sub>3</sub>                                         | -67.1                     | 50                  |
|                                       |                                                                                     | CDCl <sub>3</sub>                                         | -67.05                    | 51                  |
|                                       |                                                                                     | CDCl <sub>3</sub>                                         | -67.35                    | 52                  |
|                                       |                                                                                     | CDCl <sub>3</sub>                                         | -67.35                    | 53                  |
|                                       |                                                                                     | CDCl <sub>3</sub>                                         | -60.05                    | 54                  |
|                                       |                                                                                     | CDCl <sub>3</sub>                                         | -67.00                    | 55                  |
|                                       |                                                                                     | CDCl <sub>3</sub>                                         | -67.08                    | 56                  |
|                                       |                                                                                     | CDCl <sub>3</sub>                                         | -67.08                    | 57                  |
|                                       |                                                                                     | CDCl <sub>3</sub>                                         | -67.08                    | 38                  |
| CDCl <sub>3</sub> /CD <sub>3</sub> OH | -67.08                                                                              | 58                                                        |                           |                     |
| DMSO- <i>d</i> <sub>6</sub>           | -66.64                                                                              | 59                                                        |                           |                     |
|                                       | -68.00                                                                              | 60, 61                                                    |                           |                     |
|                                       | -67.10                                                                              | 62                                                        |                           |                     |
|                                       | -67.08                                                                              | 63                                                        |                           |                     |
| T <sub>8</sub> -014                   | CF <sub>3</sub> -CH <sub>2</sub> CH <sub>2</sub> -                                  | THF- <i>d</i> <sub>8</sub><br>DMSO- <i>d</i> <sub>6</sub> | -66.7<br>-67.3            | 15<br>64            |
| T <sub>8</sub> -015                   | HOOC-CH <sub>2</sub> CH <sub>2</sub> -                                              | DMSO- <i>d</i> <sub>6</sub>                               | -66.5                     | 65                  |
| T <sub>8</sub> -016                   | CH <sub>3</sub> CH <sub>2</sub> OOC-CH <sub>2</sub> CH <sub>2</sub> -               | DMSO- <i>d</i> <sub>6</sub>                               | -66.8                     | 65                  |
| T <sub>8</sub> -017                   | 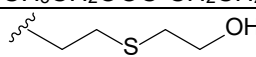 | DMSO- <i>d</i> <sub>6</sub>                               | -68.44                    | 66                  |
| T <sub>8</sub> -018                   |  | DMSO- <i>d</i> <sub>6</sub>                               | -68.51                    | 66                  |
| T <sub>8</sub> -019                   | N <sub>3</sub> -CH <sub>2</sub> CH <sub>2</sub> CH <sub>2</sub> -                   |                                                           | -67.04                    | 67                  |
|                                       |                                                                                     |                                                           | -67.1                     | 68                  |
|                                       |                                                                                     | CDCl <sub>3</sub>                                         | -69.1                     | 46                  |
|                                       |                                                                                     |                                                           | -69.07                    | 52                  |
|                                       |                                                                                     |                                                           | -69.07                    | 53                  |
| T <sub>8</sub> -020                   | NCS-CH <sub>2</sub> CH <sub>2</sub> CH <sub>2</sub> -                               | C <sub>6</sub> D <sub>6</sub><br>CDCl <sub>3</sub>        | -66.62<br>-67.58          | <sup>43</sup><br>38 |
| T <sub>8</sub> -021                   |  | CDCl <sub>3</sub>                                         | -66.52                    | 57                  |
| T <sub>8</sub> -022                   |  | CDCl <sub>3</sub>                                         | -66.60                    | 57                  |
| T <sub>8</sub> -023                   |  | CDCl <sub>3</sub>                                         | -67.11                    | 69                  |
| T <sub>8</sub> -024                   |  | CDCl <sub>3</sub>                                         | -66.81                    | 70                  |

| Entry               | Functional Group                                                                    | NMR Solvent                                                                                                                                                                 | Chemical Shift (ppm)                                        | Ref                              |
|---------------------|-------------------------------------------------------------------------------------|-----------------------------------------------------------------------------------------------------------------------------------------------------------------------------|-------------------------------------------------------------|----------------------------------|
| T <sub>8</sub> -025 | 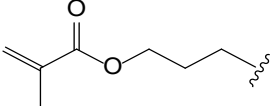   | CDCl <sub>3</sub><br>CDCl <sub>3</sub><br>DMSO- <i>d</i> <sub>6</sub>                                                                                                       | -66.79<br>-68.5<br>-66.2                                    | 70<br>16<br>71                   |
| T <sub>8</sub> -026 |    | CDCl <sub>3</sub>                                                                                                                                                           | -66.76                                                      | 72                               |
| T <sub>8</sub> -027 |    | CD <sub>2</sub> Cl <sub>2</sub>                                                                                                                                             | -66.7                                                       | 72                               |
| T <sub>8</sub> -028 |    | CDCl <sub>3</sub>                                                                                                                                                           | -66.70                                                      | 44                               |
| T <sub>8</sub> -029 |    | CDCl <sub>3</sub>                                                                                                                                                           | -66.70                                                      | 44                               |
| T <sub>8</sub> -030 |    | CDCl <sub>3</sub>                                                                                                                                                           | -66.77                                                      | 72                               |
| T <sub>8</sub> -031 | 3-ammoniumpropyl,<br>trifluoromethanesulfonate salt                                 | DMSO- <i>d</i> <sub>6</sub><br>DMSO- <i>d</i> <sub>6</sub><br>DMSO- <i>d</i> <sub>6</sub><br>DMSO- <i>d</i> <sub>6</sub><br>DMSO- <i>d</i> <sub>6</sub><br>D <sub>2</sub> O | -66.53<br>-66<br>-66.4<br>-66.63<br>-66.3 to -66.6<br>-66.7 | 73<br>74<br>75<br>76<br>77<br>78 |
| T <sub>8</sub> -032 |  | DMSO- <i>d</i> <sub>6</sub>                                                                                                                                                 | -66.7<br>-66.92<br>-66.8 to -66.9                           | 75<br>76<br>77                   |

**Table S3.** Selected <sup>29</sup>Si NMR Data for T<sub>10</sub> POSS Compounds with equivalent functional groups on all vertices (all Si atoms located in 5<sup>14</sup>2 positions)

| Entry                | Functional Group                                                                    | NMR Solvent                                                                          | Chemical Shift (ppm)      | Ref             |
|----------------------|-------------------------------------------------------------------------------------|--------------------------------------------------------------------------------------|---------------------------|-----------------|
| T <sub>10</sub> -001 | H                                                                                   | C <sub>6</sub> D <sub>6</sub><br>C <sub>6</sub> D <sub>12</sub><br>CDCl <sub>3</sub> | -86.26<br>-86.50<br>-86.4 | 6<br>7, 79<br>9 |
| T <sub>10</sub> -002 | vinyl                                                                               | CDCl <sub>3</sub>                                                                    | -81.40<br>-80.5           | 17<br>29        |
| T <sub>10</sub> -003 | phenyl                                                                              | CDCl <sub>3</sub>                                                                    | -79.61                    | 80              |
| T <sub>10</sub> -004 | p-nitrophenyl                                                                       | Acetone- <i>d</i> <sub>6</sub>                                                       | -80.92                    | 34              |
| T <sub>10</sub> -005 | p-(trimethylsilyl)phenyl                                                            | CDCl <sub>3</sub>                                                                    | -79.6                     | 34              |
| T <sub>10</sub> -006 | 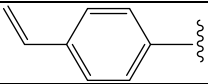 | CDCl <sub>3</sub>                                                                    | -79.59                    | 35, 81          |
| T <sub>10</sub> -007 |  | CDCl <sub>3</sub>                                                                    | -78.85                    | 82              |
| T <sub>10</sub> -008 | Ethyl                                                                               | CDCl <sub>3</sub>                                                                    | -67.56                    | 38              |
| T <sub>10</sub> -009 | 3-chloropropyl                                                                      | CDCl <sub>3</sub>                                                                    | -68.94<br>-68.95          | 44<br>57        |

| Entry                | Functional Group                                                                    | NMR Solvent                                      | Chemical Shift (ppm)    | Ref      |
|----------------------|-------------------------------------------------------------------------------------|--------------------------------------------------|-------------------------|----------|
| T <sub>10</sub> -010 | Cl-C <sub>3</sub> H <sub>6</sub> -                                                  | CDCl <sub>3</sub>                                | -68.97                  | 38       |
| T <sub>10</sub> -011 | 3-azidopropyl                                                                       | CDCl <sub>3</sub>                                | -68.94                  | 67       |
| T <sub>10</sub> -012 | NCS-C <sub>3</sub> H <sub>6</sub> -                                                 | CDCl <sub>3</sub>                                | -69.56                  | 38       |
| T <sub>10</sub> -013 | HOOC-CH <sub>2</sub> CH <sub>2</sub> -                                              | DMSO- <i>d</i> <sub>6</sub>                      | -68.7                   | 65       |
| T <sub>10</sub> -014 | CH <sub>3</sub> CH <sub>2</sub> OOC-CH <sub>2</sub> CH <sub>2</sub> -               | DMSO- <i>d</i> <sub>6</sub>                      | -68.9                   | 65       |
| T <sub>10</sub> -015 | 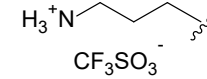   | DMSO- <i>d</i> <sub>6</sub>                      | -68.3<br>-68.3 to -68.6 | 75<br>77 |
| T <sub>10</sub> -016 |    | DMSO- <i>d</i> <sub>6</sub>                      | -68.9<br>-68.7 to -69.0 | 75<br>77 |
| T <sub>10</sub> -017 |    | CDCl <sub>3</sub>                                | -68.70                  | 70       |
| T <sub>10</sub> -018 |    | CDCl <sub>3</sub><br>DMSO- <i>d</i> <sub>6</sub> | -68.64<br>-68.1         | 70<br>71 |
| T <sub>10</sub> -019 | C <sub>8</sub> H <sub>17</sub> -                                                    | CDCl <sub>3</sub>                                | -68.68                  | 38       |
| T <sub>10</sub> -020 |    | DMSO- <i>d</i> <sub>6</sub>                      | -70.65                  | 66       |
| T <sub>10</sub> -021 |    | DMSO- <i>d</i> <sub>6</sub>                      | -70.69                  | 66       |
| T <sub>10</sub> -022 |    | CDCl <sub>3</sub>                                | -68.45                  | 57       |
| T <sub>10</sub> -023 |   | CDCl <sub>3</sub>                                | -68.51                  | 57       |
| T <sub>10</sub> -024 |  | CDCl <sub>3</sub>                                | -68.62                  | 72       |
| T <sub>10</sub> -025 |  | DMSO- <i>d</i> <sub>6</sub>                      | -68.1                   | 72       |
| T <sub>10</sub> -026 |  | CDCl <sub>3</sub>                                | -68.53                  | 44       |
| T <sub>10</sub> -027 |  | CDCl <sub>3</sub>                                | -68.41                  | 44       |
| T <sub>10</sub> -028 |  | CDCl <sub>3</sub>                                | -68.95                  | 69       |
| T <sub>10</sub> -029 |  | CDCl <sub>3</sub>                                | -68.6                   | 72       |

**Table S4.** Selected  $^{29}\text{Si}$  NMR Data for  $\text{T}_{12}$  POSS Compounds with equivalent functional groups on all vertices

| Entry                | Functional Group                                                                    | NMR Solvent                                        | Si Speciation and Chemical Shift (ppm) |                  | Ref      |
|----------------------|-------------------------------------------------------------------------------------|----------------------------------------------------|----------------------------------------|------------------|----------|
|                      |                                                                                     |                                                    | $5^14^2$                               | $5^24^1$         |          |
| T <sub>12</sub> -001 | H                                                                                   | C <sub>6</sub> D <sub>6</sub>                      | -85.78                                 | -87.76           | 6        |
| T <sub>12</sub> -002 | Vinyl                                                                               | CDCl <sub>3</sub>                                  | -80.24<br>-81.36                       | -83.26<br>-83.37 | 17<br>29 |
| T <sub>12</sub> -003 | phenyl                                                                              | CDCl <sub>3</sub> or THF- <i>d</i> <sub>8</sub>    | -78.2                                  | -80.1            | 83       |
| T <sub>12</sub> -004 | p-nitrophenyl                                                                       | Acetone- <i>d</i> <sub>6</sub>                     | -80.34                                 | -82.24           | 34       |
| T <sub>12</sub> -005 | p-(trimethylsilyl)phenyl                                                            | CDCl <sub>3</sub>                                  | -79.4                                  | -81.5            | 34       |
| T <sub>12</sub> -006 | 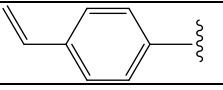   | CDCl <sub>3</sub>                                  | -79.45                                 | -81.29           | 35       |
| T <sub>12</sub> -007 |    | CDCl <sub>3</sub>                                  | -78.69                                 | -80.44           | 82       |
| T <sub>12</sub> -008 | Ethyl                                                                               | CDCl <sub>3</sub>                                  | -67.53                                 | -69.79           | 38       |
| T <sub>12</sub> -009 | Cyclohexyl                                                                          | CDCl <sub>3</sub> or C <sub>6</sub> D <sub>6</sub> | -71.29                                 | -74.29           | 40       |
| T <sub>12</sub> -010 | Cl-C <sub>3</sub> H <sub>6</sub> -                                                  | CDCl <sub>3</sub>                                  | -68.73<br>-68.71                       | -71.37<br>-71.37 | 38<br>57 |
| T <sub>12</sub> -011 | NCS-C <sub>3</sub> H <sub>6</sub> -                                                 | CDCl <sub>3</sub>                                  | -69.27                                 | -72.07           | 38       |
| T <sub>12</sub> -012 | 3-chloropropyl                                                                      | CDCl <sub>3</sub>                                  | -68.68                                 | -71.34           | 44       |
| T <sub>12</sub> -013 | 3-azidopropyl                                                                       | CDCl <sub>3</sub>                                  | -68.69                                 | -71.36           | 67       |
| T <sub>12</sub> -014 | CF <sub>3</sub> CH <sub>2</sub> CH <sub>2</sub> -                                   | THF- <i>d</i> <sub>8</sub>                         | -69.24                                 | -72.05           | 84       |
| T <sub>12</sub> -015 |  | DMSO- <i>d</i> <sub>6</sub>                        | -70.44                                 | -72.89           | 66       |
| T <sub>12</sub> -016 |  | DMSO- <i>d</i> <sub>6</sub>                        | -70.48                                 | -72.92           | 66       |
| T <sub>12</sub> -017 |  | CDCl <sub>3</sub>                                  | -68.25                                 | -70.94           | 57       |
| T <sub>12</sub> -018 |  | CDCl <sub>3</sub>                                  | -68.37                                 | -71.04           | 57       |
| T <sub>12</sub> -019 |  | CDCl <sub>3</sub>                                  | -68.47                                 | -71.18           | 70       |
| T <sub>12</sub> -020 |  | CDCl <sub>3</sub><br>DMSO- <i>d</i> <sub>6</sub>   | -68.44<br>-67.3                        | -71.14<br>-70.3  | 70<br>71 |
| T <sub>12</sub> -021 |  | DMSO- <i>d</i> <sub>6</sub>                        | -67.6                                  | -70.7            | 75       |
| T <sub>12</sub> -022 |  | DMSO- <i>d</i> <sub>6</sub>                        | -68.0<br>-68.7 to -69.0                | -71.3<br>-71.2   | 75<br>77 |
| T <sub>12</sub> -023 |  | CDCl <sub>3</sub>                                  | -68.30                                 | -71.03           | 72       |
| T <sub>12</sub> -024 |  | DMSO- <i>d</i> <sub>6</sub>                        | -67.8                                  | -70.3            | 72       |

| Entry                | Functional Group                                                                  | NMR Solvent       | Si Speciation and Chemical Shift (ppm) |          | Ref |
|----------------------|-----------------------------------------------------------------------------------|-------------------|----------------------------------------|----------|-----|
|                      |                                                                                   |                   | $5^14^2$                               | $5^24^1$ |     |
| T <sub>12</sub> -025 | 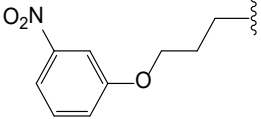 | CDCl <sub>3</sub> | -68.21                                 | -70.90   | 44  |
| T <sub>12</sub> -026 |  | CDCl <sub>3</sub> | -67.98                                 | -70.75   | 44  |
| T <sub>12</sub> -027 |  | CDCl <sub>3</sub> | -68.30                                 | -70.97   | 72  |
| T <sub>12</sub> -028 |  | CDCl <sub>3</sub> | -68.74                                 | -71.46   | 69  |

**Table S5.** Selected <sup>29</sup>Si NMR Data for T<sub>n</sub> POSS Compounds with n > 12 and with equivalent functional groups on all vertices

| Cage Type                            | Functional Group                                                                    | NMR Solvent                                        | Chemical shift (ppm) and silicon speciation |                |          |             |          |                  |        | Ref            |       |
|--------------------------------------|-------------------------------------------------------------------------------------|----------------------------------------------------|---------------------------------------------|----------------|----------|-------------|----------|------------------|--------|----------------|-------|
|                                      |                                                                                     |                                                    | $6^24^1$                                    | $6^14^2$       | $6^25^1$ | $6^15^14^1$ | $5^14^2$ | $5^24^1$         | $5^3$  |                | $4^3$ |
| T <sub>14</sub> ,<br>D <sub>3h</sub> | H                                                                                   | C <sub>6</sub> D <sub>6</sub>                      |                                             |                |          |             |          | -87.89<br>-88.03 | -89.71 |                | 6     |
| T <sub>14</sub> ,<br>D <sub>3h</sub> | Ph                                                                                  | CDCl <sub>3</sub><br>C <sub>6</sub> D <sub>6</sub> | -80.1<br>-79.1                              | -78.3<br>-77.6 |          |             |          |                  |        | -76.9<br>-76.2 | 85    |
| T <sub>14</sub><br>C <sub>2v</sub>   | H                                                                                   |                                                    |                                             | -85.35         |          | -87.68      | -85.76   | -87.95           | -88.72 |                | 6     |
| T <sub>16</sub><br>D <sub>4d</sub>   | H                                                                                   |                                                    |                                             |                |          |             |          | -88.10           | -89.27 |                | 6     |
| T <sub>18</sub>                      | 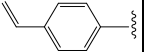 | CDCl <sub>3</sub>                                  | -77.40                                      | -78.35         | -79.12   | -79.18      | -79.35   |                  |        |                | 86    |

**Table S6.** Selected <sup>29</sup>Si NMR Data for Q<sub>n</sub> POS Compounds with equivalent functional groups on all vertices

| Entry               | Functional Group        | NMR Solvent                                       | Cage Chemical Shift (ppm)   | Ref      |
|---------------------|-------------------------|---------------------------------------------------|-----------------------------|----------|
| Q <sub>6</sub> -001 | OSi(Me) <sub>3</sub>    | Heptane                                           | -98.84                      | 87       |
| Q <sub>6</sub> -002 | OSi(Me) <sub>2</sub> H  | CDCl <sub>3</sub>                                 | -99.03<br>-98.94            | 88<br>89 |
| Q <sub>6</sub> -003 | OSi(Me) <sub>2</sub> OH | THF- <i>d</i> <sub>8</sub>                        | -99.94                      | 88       |
| Q <sub>6</sub> -004 | -OH <sup>1</sup>        | (CD <sub>3</sub> ) <sub>2</sub> CO                | -90.9                       | 90       |
| Q <sub>8</sub> -001 | OSi(Me) <sub>3</sub>    | Benzene<br>THF- <i>d</i> <sub>8</sub>             | -109.3<br>-108.95           | 91<br>92 |
| Q <sub>8</sub> -002 | OSiMe <sub>2</sub> H    | CDCl <sub>3</sub><br>CDCl <sub>3</sub><br>Heptane | -108.7<br>-110.6<br>-109.36 | 93<br>7  |



| Entry                | Functional Group                                              | NMR Solvent                                                      | Cage Chemical Shift (ppm)                                                                                                                                           | Ref            |
|----------------------|---------------------------------------------------------------|------------------------------------------------------------------|---------------------------------------------------------------------------------------------------------------------------------------------------------------------|----------------|
|                      |                                                               | THF- <i>d</i> <sub>8</sub><br>CDCl <sub>3</sub>                  | -110.34<br>-108.65                                                                                                                                                  | 94<br>92<br>95 |
| Q <sub>8</sub> -003  | OSiMe <sub>2</sub> OH                                         | THF- <i>d</i> <sub>8</sub>                                       | -109.42                                                                                                                                                             | 96             |
| Q <sub>8</sub> -004  | OSi(Me) <sub>2</sub> CHCH <sub>2</sub>                        | CDCl <sub>3</sub>                                                | -109.03                                                                                                                                                             | 97             |
| Q <sub>8</sub> -005  | -OSi(OMe) <sub>3</sub>                                        | CD <sub>3</sub> CN                                               | -110.3                                                                                                                                                              | 98             |
| Q <sub>8</sub> -006  | -OSi(Vi)(OMe) <sub>2</sub>                                    | CD <sub>3</sub> CN                                               | -110.2                                                                                                                                                              | 98             |
| Q <sub>8</sub> -007  | -OH <sup>1</sup>                                              | THF- <i>d</i> <sub>8</sub><br>(CD <sub>3</sub> ) <sub>2</sub> CO | -100.0<br>-100.2                                                                                                                                                    | 93<br>90       |
| Q <sub>8</sub> -008  | -OSi(Me) <sub>2</sub> CH <sub>2</sub> Cl                      | CDCl <sub>3</sub>                                                | -109.32                                                                                                                                                             | 97             |
| Q <sub>8</sub> -009  | -OSi( <sup><i>i</i></sup> Pr) <sub>2</sub> H                  | CDCl <sub>3</sub>                                                | -109.02                                                                                                                                                             | 99             |
| Q <sub>8</sub> -010  | -OSi( <sup><i>i</i></sup> Pr) <sub>2</sub> OH                 | THF- <i>d</i> <sub>8</sub>                                       | -109.7                                                                                                                                                              | 99             |
| Q <sub>8</sub> -011  | -OSi(Ph) <sub>2</sub> OH                                      | THF- <i>d</i> <sub>8</sub>                                       | -109.9                                                                                                                                                              | 100            |
| Q <sub>8</sub> -013  | -OSi(OEt) <sub>2</sub> H                                      | DMF- <i>d</i> <sub>7</sub>                                       | -110.2                                                                                                                                                              | 101            |
| Q <sub>10</sub> -001 | -OSi(Me) <sub>3</sub>                                         | Benzene                                                          | -110.2                                                                                                                                                              | 91, 102        |
| Q <sub>10</sub> -002 | -OSi(Me) <sub>2</sub> CHCH <sub>2</sub>                       | CDCl <sub>3</sub>                                                | -110.36                                                                                                                                                             | 97             |
| Q <sub>10</sub> -003 | -OSiMe <sub>2</sub> CH <sub>2</sub> Cl                        | CDCl <sub>3</sub>                                                | -110.82                                                                                                                                                             | 97             |
| Q <sub>12</sub> -001 | -OSi(Me) <sub>3</sub>                                         | C <sub>6</sub> D <sub>6</sub>                                    | -108.77 (5 <sup>14</sup> 2)<br>-110.48 (5 <sup>24</sup> 1)                                                                                                          | 103            |
| Q <sub>12</sub> -002 | -OSi(Me) <sub>2</sub> H (6 <sup>14</sup> 2), D <sub>6h</sub>  | CDCl <sub>3</sub>                                                | -109.58<br>-109.54                                                                                                                                                  | 95<br>104      |
| Q <sub>12</sub> -003 | -OSi(Me) <sub>2</sub> OH (6 <sup>14</sup> 2), D <sub>6h</sub> | THF- <i>d</i> <sub>8</sub>                                       | -110.62                                                                                                                                                             | 104            |
| Q <sub>12</sub> -004 | -OH, D <sub>6h</sub> <sup>1</sup>                             | DMSO- <i>d</i> <sub>6</sub>                                      | -101.2                                                                                                                                                              | 105            |
| Q <sub>14</sub> -001 | -OSi(Me) <sub>3</sub> (D <sub>3h</sub> )                      | C <sub>6</sub> D <sub>6</sub>                                    | -110.61 (5 <sup>24</sup> 1)<br>-110.77 (5 <sup>24</sup> 1)<br>-112.35 (5 <sup>3</sup> )                                                                             | 103            |
| Q <sub>14</sub> -002 | -OSi(Me) <sub>3</sub> (C <sub>2v</sub> )                      | C <sub>6</sub> D <sub>6</sub>                                    | -108.75 (6 <sup>14</sup> 2)<br>-108.96 (6 <sup>15</sup> 4 <sup>1</sup> )<br>-110.39 (5 <sup>14</sup> 2)<br>-110.78 (5 <sup>24</sup> 1)<br>-111.53 (5 <sup>3</sup> ) | 103            |

<sup>1</sup> The Si sites in these compounds are Q<sup>3</sup>; all others are Q<sup>4</sup>.

**Table S7.** Functional groups used to derive parameters *A'*, *B'*, *C'* and *D'* in Equation 2 for Q<sub>n</sub> compounds, together with the values of *k<sub>i</sub>* obtained via least-squares fitting

| Functional Group         | Q <sub>n</sub> cages used to derive <i>k<sub>i</sub></i> for each functional group (no. chemical shifts shown in parenthesis) |                       |                        |                                              |                                              |                                                  |                                                  | <i>k<sub>i</sub></i> |
|--------------------------|-------------------------------------------------------------------------------------------------------------------------------|-----------------------|------------------------|----------------------------------------------|----------------------------------------------|--------------------------------------------------|--------------------------------------------------|----------------------|
|                          | Q <sub>6</sub><br>(1)                                                                                                         | Q <sub>8</sub><br>(1) | Q <sub>10</sub><br>(1) | Q <sub>12</sub><br>(D <sub>6h</sub> )<br>(1) | Q <sub>12</sub><br>(D <sub>2d</sub> )<br>(2) | Q <sub>14</sub> (A)<br>(D <sub>3h</sub> )<br>(2) | Q <sub>14</sub> (C)<br>(C <sub>2v</sub> )<br>(5) |                      |
| -OSi(Me) <sub>3</sub>    | X                                                                                                                             | X                     | X                      |                                              | X                                            | X                                                | X                                                | -108.6               |
| -OSi(Me) <sub>2</sub> H  | X                                                                                                                             | X                     |                        | X                                            |                                              |                                                  |                                                  | -109.4               |
| -OSi(Me) <sub>2</sub> OH | X                                                                                                                             | X                     |                        | X                                            |                                              |                                                  |                                                  | -110.0               |
| -OH <sup>1</sup>         | X                                                                                                                             | X                     |                        |                                              |                                              |                                                  |                                                  | -100.0               |

<sup>1</sup> The Si sites in these compounds are Q<sup>3</sup>; all others are Q<sup>4</sup>.

## References

1. S. V. Basenko and A. A. Maylyan, *Russ. Chem. Bull.*, 2016, **65**, 1034-1038.
2. A. R. Bassindale, I. A. MacKinnon, M. G. Maesano and P. G. Taylor, *Chem. Commun.*, 2003, **3**, 1382-1383.
3. M. Unno, A. Suto, K. Takada and H. Matsumoto, *Bull. Chem. Soc. Jpn.*, 2000, **73**, 215-220.
4. F. J. Feher, D. A. Newman and J. F. Walzer, *J. Am. Chem. Soc.*, 1989, **111**, 1741-1748.
5. P. P. Pescarmona, J. C. Van Der Waal and T. Maschmeyer, *Eur. J. Inorg. Chem.*, 2004, DOI: 10.1002/ejic.200300494, 978-983.
6. P. A. Agaskar and W. G. Klemperer, *Inorg. Chim. Acta*, 1995, **229**, 355-364.
7. P. G. Harrison and C. Hall, *Main Group Met. Chem.*, 1997, **20**, 515-529.
8. W. J. Lin, W. C. Chen, W. C. Wu, Y. H. Niu and A. K. Y. Jen, *Macromolecules*, 2004, **37**, 2335-2341.
9. A. R. Bassindale and T. E. Gentle, *J. Mater. Chem.*, 1993, **3**, 1319-1325.
10. E. Markovic, M. Ginic-Markovic, S. Clarke, J. Matisons, M. Hussain and G. P. Simon, *Macromolecules*, 2007, **40**, 2694-2701.
11. C. Bolln, A. Tsuchida, H. Frey and R. Mülhaupt, *Chem. Mater.*, 1997, **9**, 1475-1479.
12. A. Tsuchida, C. Bolln, F. G. Sernetz, H. Frey and R. Mülhaupt, *Macromolecules*, 1997, **30**, 2818-2824.
13. S. Rakesh, C. P. S. Dharan, M. Selladurai, V. Sudha, P. R. Sundararajan and M. Sarojadevi, *High Perform Polym*, 2013, **25**, 87-96.
14. A. R. Bassindale, D. J. Parker, M. Pourny, P. G. Taylor, P. N. Horton and M. B. Hursthouse, *Organometallics*, 2004, **23**, 4400-4405.
15. S. E. Anderson, D. J. Bodzin, T. S. Haddad, J. A. Boatz, J. M. Mabry, C. Mitchell and M. T. Bowers, *Chem. Mater.*, 2008, **20**, 4299-4309.
16. H. Cai, X. Zhang, K. Xu, H. Liu, J. Su, X. Liu, Z. Fu, Y. Guo and M. Chen, *Polym. Adv. Technol.*, 2012, **23**, 765-775.
17. JP2008266248, 2008.
18. M. A. Hoque, Y. H. Cho and Y. Kawakami, *React Funct Polym*, 2007, **67**, 1192-1199.
19. B. M. Moore, S. M. Ramirez, G. R. Yandek, T. S. Haddad and J. M. Mabry, *J. Organomet. Chem.*, 2011, **696**, 2676-2680.
20. B. H. Yang, H. Y. Xu, C. Li and S. Y. Guang, *Chin. Chem. Lett.*, 2007, **18**, 960-962.
21. P. Siripanich, T. Bureerug, S. Chanmungkalakul, M. Sukwattanasinitt and V. Ervithayasuporn, *Organometallics*, 2022, **41**, 201-210.
22. X. M. Wang, Q. Y. Guo, S. Y. Han, J. Y. Wang, D. Han, Q. Fu and W. B. Zhang, *Chem. Eur. J.*, 2015, **21**, 15246-15255.
23. W. Zeng, H. Huang, L. Song, X. Jiang and X. Zhang, *J. Coat. Tech. Res.*, 2020, **17**, 181-191.
24. W. Tao, H. Zhou, Y. Zhang and G. Li, *Appl Surf Sci*, 2008, **254**, 2831-2836.
25. C. Zhao, X. Yang, X. Wu, X. Liu, X. Wang and L. Lu, *Polym. Bull.*, 2008, **60**, 495-505.
26. Y. Xia, H. Yao, M. Cui, Y. Ma, Z. Kong, B. Wu, Z. Qi and Y. Sun, *RSC Adv.*, 2015, **5**, 80339-80345.
27. J. Il So, D. H. Shin, J. B. Kim, H. W. Jeong, C. H. Kim, J. Choi, S. E. Shim and Y. Qian, *J. Ind. Eng. Chem.*, 2022, **113**, 502-512.
28. H. Berk, M. Kaya and A. Cihaner, *Polym. Chem.*, 2022, **13**, 5152-5158.
29. D. L. Zhou, J. H. Li, Q. Y. Guo, X. Lin, Q. Zhang, F. Chen, D. Han and Q. Fu, *Adv. Funct. Mater.*, 2021, DOI: 10.1002/adfm.202102074.
30. Z. Qi, W. Zhang, X. He and R. Yang, *Composites Science and Technology*, 2016, **127**, 8-19.
31. B. Yang, H. Xu, J. Wang, S. Gang and C. Li, *J. Appl. Polym. Sci.*, 2007, **106**, 320-326.
32. Y. Leng, J. Zhao, P. Jiang and J. Wang, *RSC Adv.*, 2015, **5**, 17709-17715.
33. Y. Y. Yang, X. Wang, Y. Hu, H. Hu, D. C. Wu and F. J. Xu, *ACS Appl. Mater. Interfaces*, 2014, **6**, 1044-1052.
34. A. Miyazato, C. Pakjamsai and Y. Kawakami, *Dalton Trans.*, 2010, **39**, 3239-3244.
35. M. Laird, A. Van Der Lee, D. G. Dumitrescu, C. Carcel, A. Ouali, J. R. Bartlett, M. Unno and M. Wong Chi Man, *Organometallics*, 2020, **39**, 1896-1906.

36. S. Sulaiman, A. Bhaskar, J. Zhang, R. Guda, T. Goodson III and R. M. Laine, *Chem. Mater.*, 2008, **20**, 5563-5573.
37. G. M. Poliskie, T. S. Haddad, R. L. Blanski and K. K. Gleason, *Thermochim Acta*, 2005, **438**, 116-125.
38. E. Rikowski and H. C. Marsmann, *Polyhedron*, 1997, **16**, 3357-3361.
39. A. R. Bassindale, Z. Liu, I. A. MacKinnon, P. G. Taylor, Y. Yang, M. E. Light, P. N. Horton and M. B. Hursthouse, *Dalton Trans.*, 2003, DOI: 10.1039/b302950f, 2945-2949.
40. F. J. Feher and T. A. Budzichowski, *J. Organomet. Chem.*, 1989, **373**, 153-163.
41. M. Unno, S. B. Alias, M. Arai, K. Takada, R. Tanaka and H. Matsumoto, *Appl. Organomet. Chem.*, 1999, **13**, 303-310.
42. J. Falkenhagen, H. Jancke, R. P. Krüger, E. Rikowski and G. Schulz, *Rapid Commun. Mass Spectrom.*, 2003, **17**, 285-290.
43. U. Dittmar, B. J. Hendan, U. Flörke and H. C. Marsmann, *J. Organomet. Chem.*, 1995, **489**, 185-194.
44. S. Hanprasit, N. Tungkijanansin, A. Prompawilai, S. Eangpayung and V. Ervithayasuporn, *Dalton Trans.*, 2016, **45**, 16117-16120.
45. B. Marciniak, M. Dutkiewicz, H. Maciejewski and M. Kubicki, *Organometallics*, 2008, **27**, 793-794.
46. Z. Ge, D. Wang, Y. Zhou, H. Liu and S. Liu, *Macromolecules*, 2009, **42**, 2903-2910.
47. J. Shen and S. Zheng, *J Polym Sci Part B*, 2006, **44**, 942-952.
48. L. Liu, W. Wang and X. Guo, *E-Polymers*, 2010, DOI: 10.1515/epoly.2010.10.1.1587.
49. W. Wang, M. Fei, X. Jie, P. Wang, H. Cao and J. Yu, *Polym. Bull.*, 2010, **65**, 863-872.
50. W. Yuan, J. Shen, L. Li, X. Liu and H. Zou, *Carbohydr Polym*, 2014, **113**, 353-361.
51. X. Qiang, X. Ma, Z. Li and X. Hou, *Colloid and Polymer Science*, 2014, **292**, 1531-1544.
52. A. Uner, E. Doganci, M. A. Tasdelen, F. Yilmaz and A. G. Gürek, *Polym. Int.*, 2017, **66**, 1610-1616.
53. E. Doganci, A. Uner, B. Canimkurbey, R. Ozdogan and M. A. Tasdelen, *Polym. Adv. Technol.*, 2018, **29**, 3020-3026.
54. J. Chojnowski, W. Fortuniak, P. Rościszewski, W. Werel, J. Łukasiak, W. Kamysz and R. Hałasa, *Journal of Inorganic and Organometallic Polymers and Materials*, 2006, **16**, 219-230.
55. J. Tan, D. Ma, X. Sun, S. Feng and C. Zhang, *Dalton Trans.*, 2013, **42**, 4337-4339.
56. Y. Leng, J. Liu, P. Jiang and J. Wang, *ACS Sustainable Chem. Eng.*, 2015, **3**, 170-176.
57. H. Wang, M. X. Nie, X. Lin, X. Q. Li, H. Liu, Q. Y. Guo, D. Han and Q. Fu, *Dalton Trans.*, 2024, DOI: 10.1039/d4dt00440j.
58. Y. Xu, J. Long, R. Zhang, Y. Du, S. Guan, Y. Wang, L. Huang, H. Wei, L. Liu and Y. Huang, *Polym Degradation Stab*, 2020, **174**.
59. A. M. C. Dumitriu, M. Balan, A. Barga, S. Shova, C. D. Varganici and M. Cazacu, *J. Mol. Struct.*, 2016, **1110**, 150-155.
60. N. L. Dias Filho, R. M. Costa, F. Marangoni and D. S. Pereira, *J. Colloid Interface Sci.*, 2007, **316**, 250-259.
61. N. L. Dias Filho, R. M. Costa and M. S. Schultz, *Inorg. Chim. Acta*, 2008, **361**, 2314-2320.
62. V. Elumalai and D. Sangeetha, *J Power Sources*, 2018, **375**, 412-420.
63. L. Ma, Y. Zhu, M. Wang, X. Yang, G. Song and Y. Huang, *Composites Science and Technology*, 2019, **170**, 148-156.
64. S. T. Iacono, A. Vij, W. Grabow, D. W. Smith Jr and J. M. Mabry, *Chem. Commun.*, 2007, DOI: 10.1039/b712976a, 4992-4994.
65. T. Kozuma and Y. Kaneko, *J Polym Sci Part A*, 2019, **57**, 2511-2518.
66. X. Lin, M. X. Nie, H. Liu, D. L. Zhou, S. R. Fu, Q. Zhang, D. Han and Q. Fu, *Chem. Mater.*, 2024, **296**, 575-584.
67. V. Ervithayasuporn, X. Wang and Y. Kawakami, *Chem. Commun.*, 2009, DOI: 10.1039/b909802j, 5130-5132.
68. J. Zhang, D. Si, S. Wang, H. Liu, X. Chen, H. Zhou, M. Yang and G. Zhang, *Macromol. Res.*, 2020, **28**, 152-158.
69. T. Jaroentomeechai, P. K. Yingsukkamol, C. Phurat, E. Somsook, T. Osotchan and V. Ervithayasuporn, *Inorg. Chem.*, 2012, **51**, 12266-12272.
70. V. Ervithayasuporn and S. Chimjarn, *Inorg. Chem.*, 2013, **52**, 13108-13112.
71. J. Peng, K. Xu, H. Cai, J. Wu, W. Lin, Z. Yu and M. Chen, *RSC Adv.*, 2014, **4**, 7124-7131.

72. S. Chimjarn, R. Kunthom, P. Chancharone, R. Sodkhomkhum, P. Sangtrirutnugul and V. Ervithayasuporn, *Dalton Trans.*, 2015, **44**, 916-919.
73. M. Janeta, Ł. John, J. Ejfler and S. Szafet, *Chem. Eur. J.*, 2014, **20**, 15966-15974.
74. Y. Kaneko, M. Shoiriki and T. Mizumo, *J. Mater. Chem.*, 2012, **22**, 14475-14478.
75. K. Imai and Y. Kaneko, *Inorg. Chem.*, 2017, **56**, 4133-4140.
76. T. Matsumoto and Y. Kaneko, *Chem. Lett.*, 2018, **47**, 864-867.
77. T. Matsumoto and Y. Kaneko, *Bull. Chem. Soc. Jpn.*, 2019, **92**, 1060-1067.
78. G. Soufi, H. Bagheri, L. Yeganeh Rad and S. Minaeian, *Anal. Chim. Acta*, 2022, **1198**.
79. J. Kowalewski, T. Nilsson and K. W. Törnroos, *Journal of the Chemical Society - Dalton Transactions*, 1996, DOI: 10.1039/DT9960001597, 1597-1599.
80. J. C. Furgal, T. Goodson, III and R. M. Laine, *Dalton Trans.*, 2016, **45**, 1025-1039.
81. M. Laird, J. Yokoyama, C. Carcel, M. Unno, J. R. Bartlett and M. Wong Chi Man, *J Sol Gel Sci Technol*, 2020, **95**, 760-770.
82. J. C. Furgal, J. H. Jung, T. Goodson and R. M. Laine, *J. Am. Chem. Soc.*, 2013, **135**, 12259-12269.
83. A. S. Lee, S. S. Choi, H. S. Lee, K. Y. Baek and S. S. Hwang, *Dalton Trans.*, 2012, **41**, 10585-10588.
84. M. Iacob, A. Bele, A. Airinei and M. Cazacu, *Colloids Surf. A Physicochem. Eng. Asp.*, 2017, **522**, 66-73.
85. M. Hunsicker, B. Morgenstern, M. Zimmer and D. Scheschkewitz, *Chem. Eur. J.*, 2023, **Art. e202303640**.
86. M. Laird, N. Herrmann, N. Ramsahye, C. Totée, C. Carcel, M. Unno, J. R. Bartlett and M. Wong Chi Man, *Angew. Chem. Int. Ed.*, 2021, **60**, 3022-3027.
87. D. Hoebbel, G. Engelhardt, A. Samoson, K. Újzászy and Y. I. Smolin, *Z. Anorg. Allg. Chem.*, 1987, **552**, 236-240.
88. N. Sato, K. Tochigi, Y. Kuroda, H. Wada, A. Shimojima and K. Kuroda, *Dalton Trans.*, 2019, **48**, 1969-1975.
89. P. G. Harrison, R. Kannengiesser and C. J. Hall, *Main Group Met. Chem.*, 1997, **20**, 137-141.
90. WO2018193732, 2018.
91. D. Hoebbel, W. Wieker, G. Garzó, G. Engelhardt, H. Jancke and P. Franke, *Z. Anorg. Allg. Chem.*, 1976, **424**, 115-127.
92. I. Hasegawa, K. Ino and H. Ohnishi, *Appl. Organomet. Chem.*, 2003, **17**, 287-290.
93. T. Nozawa, T. Matsumoto, F. Yagihashi, T. Beppu, K. Sato and M. Igarashi, *Chem. Lett.*, 2018, **47**, 1530-1533.
94. D. Hoebbel, I. Pitsch, A. R. Grimmer, H. Jancke, W. Hiller and R. K. Harris, *Zeitschrift für Chemie*, 1989, **29**, 260-261.
95. M. Kikuchi, T. Hayashi, T. Matsuno, K. Kuroda and A. Shimojima, *Dalton Trans.*, 2024, **53**, 6256-6263.
96. N. Sato, Y. Kuroda, H. Wada, A. Shimojima and K. Kuroda, *Chem. Eur. J.*, 2018, **24**, 17033-17038.
97. P. A. Agaskar, *Synth. React. Inorg. Met-Org. Chem.*, 1990, **20**, 483-493.
98. T. Nozawa, T. Kobayashi, T. Matsumoto, F. Yagihashi, K. Sato and M. Igarashi, *Dalton Trans.*, 2021, **50**, 1594-1598.
99. N. Sato, Y. Kuroda, H. Wada, A. Shimojima and K. Kuroda, *Chem. Lett.*, 2021, **50**, 1770-1772.
100. K. Kawahara, H. Tachibana, Y. Hagiwara and K. Kuroda, *New J. Chem.*, 2012, **36**, 1210-1217.
101. WO2021085482, 2021.
102. D. Hoebbel, W. Wieker, P. Franke and A. Otto, *Z. Anorg. Allg. Chem.*, 1975, **418**, 35-44.
103. P. A. Agaskar, V. W. Day and W. G. Klemperer, *J. Am. Chem. Soc.*, 1987, **109**, 5554-5556.
104. N. Sato, H. Wada, K. Kuroda and A. Shimojima, *Chem. Lett.*, 2024, **53**.
105. JP2023130962, 2023.
